# Supplementary material for: Relationship between medical students’ perceived instructor role and their approaches to using online learning technologies in a cloud-based virtual classroom
Source: Research Square preprint supplement (doi:10.21203/rs.3.rs-1406388/v2), 2022-07-26
Supplement: Supplementary file 1 [file e7167129596286d1dd538b27.pdf]

Table 1 Factor analysis of the questionnaire used in this study

| The KMO and Bartlett's test in the section                                                                                                                                             | Variable<br>(number of items)                           | Item                                                                                                                   | Factor |   |   |   |   |
|----------------------------------------------------------------------------------------------------------------------------------------------------------------------------------------|---------------------------------------------------------|------------------------------------------------------------------------------------------------------------------------|--------|---|---|---|---|
|                                                                                                                                                                                        |                                                         |                                                                                                                        | 1      | 2 | 3 | 4 | 5 |
| <b>The role of instructors</b><br>(KMO = 0.92, Bartlett test of sphericity: $\chi^2(105) = 1715.70$ , $p < 0.00$ , total variance explained = 67.19%)                                  | Instructor support (4)                                  | The course goals/objectives were clearly outlined                                                                      | .70    |   |   |   |   |
|                                                                                                                                                                                        |                                                         | I knew what I was expected to accomplish each week                                                                     | .79    |   |   |   |   |
|                                                                                                                                                                                        | Instructor-student interaction (7)                      | The instructors provided clear instructions for assignments and quizzes                                                | .78    |   |   |   |   |
|                                                                                                                                                                                        |                                                         | The courses provided relevant resources                                                                                | .58    |   |   |   |   |
|                                                                                                                                                                                        |                                                         | The feedback on the assignments was helpful                                                                            | .59    |   |   |   |   |
|                                                                                                                                                                                        |                                                         | I felt that I could ask any questions regarding the course materials to the instructors                                | .67    |   |   |   |   |
|                                                                                                                                                                                        |                                                         | The instructors encouraged me to become actively involved in the course discussions                                    | .61    |   |   |   |   |
|                                                                                                                                                                                        |                                                         | The instructors provided me feedback on my work through comments                                                       | .72    |   |   |   |   |
|                                                                                                                                                                                        |                                                         | I was able to interact with the instructors during the course discussions                                              | .73    |   |   |   |   |
|                                                                                                                                                                                        |                                                         | The instructors treated me individually                                                                                | .70    |   |   |   |   |
|                                                                                                                                                                                        |                                                         | The instructors informed me about my progress periodically                                                             | .68    |   |   |   |   |
|                                                                                                                                                                                        |                                                         | The instructors adopted different teaching methods from those in face-to-face courses                                  | .77    |   |   |   |   |
|                                                                                                                                                                                        | Instructor innovation (4)                               | The instructors designed new online learning activities to get us involved                                             | .84    |   |   |   |   |
|                                                                                                                                                                                        |                                                         | The instructors used various and innovative teaching methods in the online courses                                     | .87    |   |   |   |   |
|                                                                                                                                                                                        |                                                         | The instructors assigned different learning tasks in online courses                                                    | .82    |   |   |   |   |
| <b>Student Approaches to Using Online Learning Technologies</b><br>(KMO = 0.89, Bartlett test of sphericity: $\chi^2(45) = 1626.58$ , $p < 0.001$ , total variance explained = 76.35%) | Deep approach to online learning technology support (6) | I find I use the online learning technologies in this course to further my research into a topic.                      | .88    |   |   |   |   |
|                                                                                                                                                                                        |                                                         | I spend time using the online learning technologies in this course to develop my knowledge on key topics.              | .91    |   |   |   |   |
|                                                                                                                                                                                        |                                                         | I try to use the online learning technologies in this course to achieve a more complete understanding of key concepts. | .90    |   |   |   |   |
|                                                                                                                                                                                        |                                                         | I find interacting with online learning technologies in this course promotes deeper understanding of key ideas.        | .93    |   |   |   |   |
|                                                                                                                                                                                        |                                                         | I try to use the online learning technologies in this course to communicate with other participants to test my ideas.  | .84    |   |   |   |   |
|                                                                                                                                                                                        | Surface approach to online learning technology (4)      | I find using the online learning technologies in this course help me to develop my critical thinking.                  | .86    |   |   |   |   |
|                                                                                                                                                                                        |                                                         | I restrict my use of online learning technologies in this course to do as little as possible.                          | .79    |   |   |   |   |
|                                                                                                                                                                                        |                                                         | I do not use the online learning technologies in this course to enable me to achieve my goals.                         | .86    |   |   |   |   |
|                                                                                                                                                                                        |                                                         | I only use the online learning technologies in this course to fulfil course requirements.                              | .82    |   |   |   |   |
|                                                                                                                                                                                        |                                                         | I do not find using online technologies in this course helps me to understand things more deeply.                      | .65    |   |   |   |   |

Table 2. Descriptive statistics and reliabilities of the variables (N = 192).

|                     | Instructor support | Instructor-student interaction | Instructor innovation | Deep approach | Surface approach |
|---------------------|--------------------|--------------------------------|-----------------------|---------------|------------------|
| <i>M</i>            | 3.81               | 3.94*                          | 3.75                  | 3.51          | 2.60*            |
| <i>SD</i>           | 0.72               | 0.57                           | 0.76                  | 0.97          | 0.85             |
| <i>Cronbach's α</i> | 0.80               | 0.88                           | 0.90                  | 0.96          | 0.82             |

Note. Measured on a scale from 1 (disagree) to 5 (agree), \*  $P < 0.05$ .

Table 3-1. Bonferroni post hoc test: The difference among the three dimensions of instructor role

| (I) Instructor role            | (J) Instructor role            | Mean Difference (I-J) | 95% Confidence for Interval Difference |             | Sig.    |
|--------------------------------|--------------------------------|-----------------------|----------------------------------------|-------------|---------|
|                                |                                |                       | Lower Bound                            | Upper Bound |         |
| Instructor support             | Instructor innovation          | 0.07                  | -0.07                                  | 0.20        | 0.72    |
| Instructor-student interaction | Instructor innovation          | 0.19*                 | 0.09                                   | 0.30        | < 0.001 |
| Instructor support             | Instructor-student interaction | -0.13*                | -0.22                                  | -0.03       | 0.004   |

Table 3-2. Paired samples test: The difference between two types of learning approach

| (I) Learning approach                               | (J) Learning approach                                  | Mean Difference (I-J) | 95% Confidence for Interval Difference |             | Sig.    |
|-----------------------------------------------------|--------------------------------------------------------|-----------------------|----------------------------------------|-------------|---------|
|                                                     |                                                        |                       | Lower Bound                            | Upper Bound |         |
| Deep approaches to use online learning technologies | Surface approaches to use online learning technologies | 0.92*                 | 0.70                                   | 1.14        | < 0.001 |

Table 4. The correlation coefficients between instructor role and the learning approaches to use online learning technologies scales

|                                |           | Instructor support | Instructor-student interaction | Instructor innovation | Deep approach | Surface approach |
|--------------------------------|-----------|--------------------|--------------------------------|-----------------------|---------------|------------------|
| Instructor support             | <i>r</i>  | 1                  | 0.67**                         | 0.45**                | 0.59**        | - 0.45**         |
|                                | (p-value) |                    | (<0.001)                       | (<0.001)              | (<0.001)      | (<0.001)         |
| Instructor-student interaction | <i>r</i>  |                    | 1                              | 0.63**                | 0.61**        | - 0.36**         |
|                                | (p-value) |                    |                                | (<0.001)              | (<0.001)      | (<0.001)         |
| Instructor innovation          | <i>r</i>  |                    |                                | 1                     | 0.62**        | - 0.24**         |
|                                | (p-value) |                    |                                |                       | (<0.001)      | (<0.001)         |
| Deep approach                  | <i>r</i>  |                    |                                |                       | 1             | - 0.44**         |
|                                | (p-value) |                    |                                |                       |               | (<0.001)         |
| Surface approach               |           |                    |                                |                       |               | 1                |

\*\*  $P < 0.001$

Table 5. Regression results of instructor role on approaches to use online learning technologies

| Dependent variable | $R^2$ | Instructor support | Instructor-student interaction | Instructor innovation |
|--------------------|-------|--------------------|--------------------------------|-----------------------|
| Deep approach      | 0.52  | 0.31**             | 0.16*                          | 0.38**                |
| Surface approach   | 0.20  | - 0.37**           | - 0.10                         | -0.01                 |

\*  $P < 0.05$ , \*\*  $P < 0.001$
